# Supplementary material for: Late Effects of Low-Dose Radiation on the Bone Marrow, Lung, and Testis Collected From the Same Exposed BALB/cJ Mice
Source: PubMed Central journal article supplement — Dose Response. 2018 Dec 19;16(4):1559325818815031. doi: 10.1177/1559325818815031 (PMC6302279; doi:10.1177/1559325818815031), 2018-12-19
Supplement: Table_1_word_format.pdf [file Table_1_word_format.pdf]

**Table1 Raw data and descriptive statistics**

Levels of cleaved PARP (absorbance at 450 nm in 100 mg protein)

| <u>Bone marrow</u> |           |                   |             |        | <u>Lung</u> |                |           |                        |                  | <u>Testis</u> |        |                     |           |                        |         |        |       |  |
|--------------------|-----------|-------------------|-------------|--------|-------------|----------------|-----------|------------------------|------------------|---------------|--------|---------------------|-----------|------------------------|---------|--------|-------|--|
| Radiation ID       | Animal ID | Levels of cleaved | Median dose | Mean   | S.E.        | Radiation dose | Animal ID | Levels of cleaved (Gy) | Median PARP (Gy) | Mean          | S.E.   | Radiation dose (Gy) | Animal ID | Levels of cleaved PARP | Mean    | S.E.   | dose  |  |
| 0                  | 1         | 0.10215           |             |        |             | 0              | 1         | 0.10215                |                  |               |        | 0                   | 1         | 0.0745                 |         |        |       |  |
|                    | 2         | 0.09515           |             |        |             |                | 2         | 0.09015                |                  |               |        |                     |           | 2                      | 0.07825 |        |       |  |
|                    | 3         | 0.1044            |             |        |             |                | 3         | 0.1044                 |                  |               |        |                     |           | 3                      | 0.06545 |        |       |  |
|                    | 4         | 0.11375           |             |        |             |                | 4         | 0.11375                |                  |               |        |                     |           | 4                      | 0.10535 |        |       |  |
|                    | 5         | 0.11275           |             |        |             |                | 5         | 0.09515                |                  |               |        |                     |           | 5                      | 0.1033  |        |       |  |
|                    |           |                   | 0.1044      | 0.1056 | 0.003       |                |           |                        | 0.10215          | 0.1011        | 0.004  |                     |           |                        | 0.0783  | 0.0854 | 0.008 |  |
| 0.05               | 6         | 0.10315           |             |        |             | 0.05           | 6         | 0.10315                |                  |               |        | 0.05                | 6         | 0.07495                |         |        |       |  |
|                    | 7         | 0.08455           |             |        |             |                | 7         | 0.08955                |                  |               |        |                     |           | 7                      | 0.09935 |        |       |  |
|                    | 8         | 0.10245           |             |        |             |                | 8         | 0.10245                |                  |               |        |                     |           | 8                      | 0.082   |        |       |  |
|                    | 9         | 0.1091            |             |        |             |                | 9         | 0.10315                |                  |               |        |                     |           | 9                      | 0.10075 |        |       |  |
|                    | 10        | 0.08905           |             |        |             |                | 10        | 0.08905                |                  |               |        |                     |           | 10                     | 0.10685 |        |       |  |
|                    |           |                   | 0.10245     | 0.0977 | 0.005       |                |           |                        | 0.10245          | 0.0975        | 0.0033 |                     |           |                        | 0.0994  | 0.0928 | 0.006 |  |
| 0.1                | 11        | 0.10175           |             |        |             | 0.1            | 11        | 0.10175                |                  |               |        | 0.1                 | 11        | 0.1113                 |         |        |       |  |
|                    | 12        | 0.1098            |             |        |             |                | 12        | 0.1098                 |                  |               |        |                     |           | 12                     | 0.08585 |        |       |  |
|                    | 13        | 0.1067            |             |        |             |                | 13        | 0.1067                 |                  |               |        |                     |           | 13                     | 0.0969  |        |       |  |
|                    | 14        | 0.13085           |             |        |             |                | 14        | 0.1284                 |                  |               |        |                     |           | 14                     | 0.1043  |        |       |  |
|                    | 15        | 0.13325           |             |        |             |                | 15        | 0.13325                |                  |               |        |                     |           | 15                     | 0.10215 |        |       |  |
|                    |           |                   | 0.1098      | 0.1165 | 0.006       |                |           |                        | 0.1098           | 0.116         | 0.0062 |                     |           |                        | 0.1022  | 0.1001 | 0.004 |  |
| 1                  | 16        | 0.1159            |             |        |             | 1              | 16        | 0.1166                 |                  |               |        | 1                   | 16        | 0.10655                |         |        |       |  |
|                    | 17        | 0.11065           |             |        |             |                | 17        | 0.11065                |                  |               |        |                     |           | 17                     | 0.1101  |        |       |  |
|                    | 18        | 0.1302            |             |        |             |                | 18        | 0.1308                 |                  |               |        |                     |           | 18                     | 0.09935 |        |       |  |
|                    | 19        | 0.13275           |             |        |             |                | 19        | 0.13275                |                  |               |        |                     |           | 19                     | 0.09715 |        |       |  |

20 0.1308  
0.1302 0.1241 0.005

20 0.1308  
0.1308 0.1243 0.0045

20 0.09185  
0.0994 0.101 0.003

Levels of activated NF-κB (absorbance at 450 nm in 100 mg protein)

Bone marrow

Lung

Testis

| Radiation dose (Gy) | Animal ID | Levels of activated NF-κB | Median | Mean | S.E. | Mea n | S.E. |
|---------------------|-----------|---------------------------|--------|------|------|-------|------|
|                     |           |                           |        |      |      |       |      |

| Radiation dose (Gy) | Animal ID | Levels of activated NF-κB | Median | Mean | S.E. |
|---------------------|-----------|---------------------------|--------|------|------|
|                     |           |                           |        |      |      |

|      |    |         |         |    |         |      |    |                     |
|------|----|---------|---------|----|---------|------|----|---------------------|
| 0    | 1  | 0.75375 | 0 Gy    | 1  | 0.44625 | 0    | 1  | 0.50375             |
|      | 2  | 0.3825  |         | 2  | 0.61125 |      | 2  | 0.53                |
|      | 3  | 0.3775  |         | 3  | 0.6875  |      | 3  | 0.50375             |
|      | 4  | 0.60875 |         | 4  | 0.60125 |      | 4  | 0.32625             |
|      | 5  | 0.2725  |         | 5  | 0.795   |      | 5  | 0.57                |
|      |    |         |         |    |         |      |    | 0.5038 0.4868 0.042 |
| 0.05 | 6  | 0.56625 | 0.05 Gy | 6  | 0.44875 | 0.05 | 6  | 0.34625             |
|      | 7  | 0.50625 |         | 7  | 0.54375 |      | 7  | 0.2                 |
|      | 8  | 0.5175  |         | 8  | 0.56125 |      | 8  | 0.325               |
|      | 9  | 0.67625 |         | 9  | 0.59    |      | 9  | 0.35375             |
|      | 10 | 0.735   |         | 10 | 0.76625 |      | 10 | 0.6325              |
|      |    |         |         |    |         |      |    | 0.3463 0.3715 0.071 |
| 0.1  | 11 | 1.58    | 0.1     | 11 | 0.68125 | 0.1  | 11 | 1.08375             |
|      | 12 | 1.56125 |         | 12 | 1.1     |      | 12 | 0.8725              |
|      | 13 | 1.75    |         | 13 | 1.0275  |      | 13 | 0.94125             |
|      | 14 | 1.9825  |         | 14 | 1.08    |      | 14 | 0.75625             |
|      | 15 | 2.05875 |         | 15 | 1.17375 |      | 15 | 1.1                 |
|      |    |         |         |    |         |      |    | 0.9413 0.9508 0.065 |
| 1.0  | 16 | 2.46375 | 1.0     | 16 | 1.0825  | 1.0  | 16 | 1.055               |
|      | 17 | 2.38875 |         | 17 | 1.245   |      | 17 | 0.98625             |
|      | 18 | 2.6125  |         | 18 | 1.265   |      | 18 | 1.01625             |
|      | 19 | 2.70625 |         | 19 | 1.18    |      | 19 | 0.89625             |
|      | 20 | 3.01375 |         | 20 | 1.3975  |      | 20 | 1.305               |
|      |    |         |         |    |         |      |    | 1.0163 1.0518 0.069 |

Levels of TNF- $\alpha$  (in 100 mg protein)

Bone marrow

Lung

Testis

| Radiation<br>Levels of<br>dose<br>(Gy) | Animal<br>ID | Median<br>TNF- $\alpha$ | Me<br>an | S.E.   | Radiation<br>Levels of<br>dose | Animal<br>ID | Median<br>TNF- $\alpha$ | Mea<br>n | S.E.    | Radiation<br>Levels of<br>dose<br>(Gy) | Animal<br>ID | Median<br>TNF- $\alpha$ | Mean | S.E.     |
|----------------------------------------|--------------|-------------------------|----------|--------|--------------------------------|--------------|-------------------------|----------|---------|----------------------------------------|--------------|-------------------------|------|----------|
| 0                                      | 1            | 3.248031                | 3.42188  | 3.4396 | 0.1075                         | 0            | 1                       | 0.92127  | 1.00065 | 1.0158                                 | 0.0329       | 0                       | 1    | 0.896486 |
|                                        | 2            | 3.561126                |          |        |                                |              | 2                       | 1.00065  |         |                                        |              |                         | 2    | 1.088909 |
|                                        | 3            | 3.779808                |          |        |                                |              | 3                       | 0.9786   |         |                                        |              |                         | 3    | 1.148879 |
|                                        | 4            | 3.421875                |          |        |                                |              | 4                       | 1.10129  |         |                                        |              |                         | 4    | 0.888805 |
|                                        | 5            | 3.187356                |          |        |                                |              | 5                       | 1.07719  |         |                                        |              |                         | 5    | 0.99663  |
| 0.9966 1.0039 0.052                    |              |                         |          |        |                                |              |                         |          |         |                                        |              |                         |      |          |
| 0.05                                   | 6            | 3.561222                | 3.56122  | 3.5129 | 0.0865                         | 0.05         | 6                       | 1.10407  | 1.10407 | 1.0647                                 | 0.0607       | 0.05                    | 6    | 0.986924 |
|                                        | 7            | 3.558649                |          |        |                                |              | 7                       | 1.17062  |         |                                        |              |                         | 7    | 1.175316 |
|                                        | 8            | 3.584254                |          |        |                                |              | 8                       | 1.12553  |         |                                        |              |                         | 8    | 0.983863 |
|                                        | 9            | 3.178789                |          |        |                                |              | 9                       | 0.82755  |         |                                        |              |                         | 9    | 1.151918 |
|                                        | 10           | 3.681429                |          |        |                                |              | 10                      | 1.09568  |         |                                        |              |                         | 10   | 1.063526 |
| 1.0635 1.0723 0.04                     |              |                         |          |        |                                |              |                         |          |         |                                        |              |                         |      |          |
| 0.1                                    | 11           | 5.188774                | 4.69778  | 4.4925 | 0.3656                         | 0.1          | 11                      | 0.97262  | 1.2287  | 1.3051                                 | 0.0837       | 0.1                     | 11   | 1.655264 |
|                                        | 12           | 5.309698                |          |        |                                |              | 12                      | 1.09118  |         |                                        |              |                         | 12   | 1.547562 |
|                                        | 13           | 4.697782                |          |        |                                |              | 13                      | 1.2287   |         |                                        |              |                         | 13   | 1.589497 |
|                                        | 14           | 3.660192                |          |        |                                |              | 14                      | 1.64134  |         |                                        |              |                         | 14   | 1.548698 |
|                                        | 15           | 3.605889                |          |        |                                |              | 15                      | 1.59189  |         |                                        |              |                         | 15   | 1.472571 |
| 1.5487 1.5627 0.03                     |              |                         |          |        |                                |              |                         |          |         |                                        |              |                         |      |          |
| 1.0                                    | 16           | 4.639923                | 4.6871   | 4.7694 | 0.1427                         | 1.0          | 16                      | 1.50867  | 1.51642 | 1.4674                                 | 0.0558       | 1.0                     | 16   | 1.717194 |
|                                        | 17           | 4.926402                |          |        |                                |              | 17                      | 1.5292   |         |                                        |              |                         | 17   | 1.663149 |
|                                        | 18           | 5.219689                |          |        |                                |              | 18                      | 1.53782  |         |                                        |              |                         | 18   | 1.5021   |
|                                        | 19           | 4.687104                |          |        |                                |              | 19                      | 1.51642  |         |                                        |              |                         | 19   | 1.542832 |
|                                        | 20           | 4.373916                |          |        |                                |              | 20                      | 1.245    |         |                                        |              |                         | 20   | 1.465178 |
| 1.5428 1.5781 0.048                    |              |                         |          |        |                                |              |                         |          |         |                                        |              |                         |      |          |

**Levels of IL-1 $\beta$  (in 100  $\mu$ g protein)**

**Bone marrow**

| Radiation dose (Gy) | Animal ID | Levels of IL-1 $\beta$ | Median | S.E. |
|---------------------|-----------|------------------------|--------|------|
|---------------------|-----------|------------------------|--------|------|

**Lung**

| Radiation dose (Gy) | Animal ID | Levels of IL-1 $\beta$ | Median | Mean | S.E. |
|---------------------|-----------|------------------------|--------|------|------|
|---------------------|-----------|------------------------|--------|------|------|

**Testis**

| Radiation dose (Gy) | Animal ID | Levels of IL-1 $\beta$ | Median | Mean | S.E. |
|---------------------|-----------|------------------------|--------|------|------|
|---------------------|-----------|------------------------|--------|------|------|

|   |   |          |   |       |       |          |       |          |          |       |   |        |   |          |
|---|---|----------|---|-------|-------|----------|-------|----------|----------|-------|---|--------|---|----------|
| 0 | 1 | 18.16848 | 0 | 1     | 5.696 | 0        | 1     | 7.436252 |          |       |   |        |   |          |
|   | 2 | 17.56352 | 2 | 5.465 | 2     | 9.359853 | 3     | 20.81019 | 3        | 6.678 | 3 | 9.7693 | 4 | 15.52928 |
|   |   |          |   |       |       | 4        | 5.111 | 4        | 7.555218 |       |   |        |   |          |

|      |    |          |        |       |       |        |        |          |       |          |        |       |
|------|----|----------|--------|-------|-------|--------|--------|----------|-------|----------|--------|-------|
|      | 5  | 18.04335 |        | 5     | 5.046 |        | 5      | 8.320809 |       |          |        |       |
|      |    | 18.0433  | 18.023 | 0.843 |       | 5.465  | 5.5992 | 0.2947   |       |          |        |       |
|      |    |          |        |       |       |        | 8.3208 | 8.4883   | 0.469 |          |        |       |
| 0.05 | 6  | 17.4162  |        | 0.05  | 6     | 4.567  |        | 0.05     | 6     | 9.438469 |        |       |
|      | 7  | 18.60992 |        |       | 7     | 5.393  |        |          | 7     | 8.265636 |        |       |
|      | 8  | 18.41502 |        |       | 8     | 6.364  |        |          | 8     | 8.122265 |        |       |
|      | 9  | 23.12425 |        |       | 9     | 6.541  |        |          | 9     | 8.560396 |        |       |
|      | 10 | 15.18769 |        |       | 10    | 5.068  |        |          | 10    | 8.712832 |        |       |
|      |    | 18.415   | 18.551 | 1.295 |       | 5.393  | 5.5866 | 0.3783   |       | 8.5604   | 8.6199 | 0.23  |
| 0.1  | 11 | 20.50616 |        | 0.1   | 11    | 8.287  |        | 0.1      | 11    | 10.79046 |        |       |
|      | 12 | 22.24324 |        |       | 12    | 6.722  |        |          | 12    | 13.74511 |        |       |
|      | 13 | 21.57652 |        |       | 13    | 8.304  |        |          | 13    | 13.03131 |        |       |
|      | 14 | 21.15966 |        |       | 14    | 10.416 |        |          | 14    | 10.38243 |        |       |
|      | 15 | 23.67021 |        |       | 15    | 6.865  |        |          | 15    | 11.49638 |        |       |
|      |    | 21.5765  | 21.831 | 0.54  |       | 8.287  | 8.1188 | 0.6656   |       | 11.496   | 11.889 | 0.647 |
| 1.0  | 16 | 28.23766 |        | 1.0   | 16    | 9.785  |        | 1.0      | 16    | 11.67602 |        |       |
|      | 17 | 36.91976 |        |       | 17    | 7.754  |        |          | 17    | 11.93812 |        |       |
|      | 18 | 32.54425 |        |       | 18    | 10.066 |        |          | 18    | 14.03133 |        |       |
|      | 19 | 26.78788 |        |       | 19    | 8.227  |        |          | 19    | 10.74961 |        |       |
|      | 20 | 27.27389 |        |       | 20    | 9.164  |        |          | 20    | 13.33751 |        |       |
|      |    | 28.2377  | 30.353 | 1.931 |       | 9.164  | 8.9992 | 0.4433   |       | 11.938   | 12.347 | 0.591 |

Levels of IL-6 (in 100 mg protein)

Bone marrow

| Radiation dose (Gy) | Animal ID | Levels of Median IL-6 | Mean | S.E. |
|---------------------|-----------|-----------------------|------|------|
|---------------------|-----------|-----------------------|------|------|

Lung

| Radiation dose (Gy) | Animal ID | Levels of Median IL-6 | Mean | S.E. |
|---------------------|-----------|-----------------------|------|------|
|---------------------|-----------|-----------------------|------|------|

Testis

| Radiation dose (Gy) | Animal ID | Levels of Median IL-6 | Mean | S.E. |
|---------------------|-----------|-----------------------|------|------|
|---------------------|-----------|-----------------------|------|------|

|   |   |        |  |  |
|---|---|--------|--|--|
| 0 | 1 | .37956 |  |  |
|---|---|--------|--|--|

---

|   |   |                     |
|---|---|---------------------|
| 0 | 1 | 1.036801            |
|   | 2 | 1.066063 3          |
|   |   | 1.049396 4          |
|   |   | 1.038786            |
| 5 |   | 1.262299            |
|   |   | 1.0494 1.0907 0.043 |

---

|   |                       |
|---|-----------------------|
| 2 | 0.43835 3             |
|   | 0.40507 4             |
|   | 0.29298               |
| 5 | 0.39317               |
|   | 0.39317 0.3818 0.0243 |

---

---

|   |   |                        |
|---|---|------------------------|
| 0 | 1 | 0.31604                |
|   | 2 | 0.16148                |
|   | 3 | 0.217018               |
|   | 4 | 0.31604                |
|   | 5 | 0.16148                |
|   |   | 0.21702 0.23151 0.0452 |

---

|      |   |          |
|------|---|----------|
| 0.05 | 6 | 1.177584 |
|------|---|----------|

|   |          |
|---|----------|
| 7 | 0.961952 |
|---|----------|

|      |   |         |
|------|---|---------|
| 0.05 | 6 | 0.41545 |
|------|---|---------|

|   |         |
|---|---------|
| 7 | 0.41613 |
|---|---------|

|      |   |          |
|------|---|----------|
| 0.05 | 6 | 0.192116 |
|------|---|----------|

|   |          |
|---|----------|
| 7 | 0.148481 |
|---|----------|

|            |    |                       |  |            |                        |         |            |                        |          |
|------------|----|-----------------------|--|------------|------------------------|---------|------------|------------------------|----------|
|            | 8  | 1.276626              |  | 8          | 0.44879                |         | 8          | 0.21776                |          |
|            | 9  | 1.083655              |  | 9          | 0.31996                |         | 9          | 0.305549               |          |
|            | 10 | 1.147111              |  | 10         | 0.38315                |         | 10         | 0.21776                |          |
|            |    | 1.14711 1.1294 0.052  |  |            | 0.41545 0.3967 0.0218  |         |            | 0.21776                |          |
| <b>0.1</b> | 11 | 1.433885              |  | <b>0.1</b> | 11                     | 0.72643 | <b>0.1</b> | 11                     | 0.403751 |
|            | 12 | 1.326063              |  |            | 12                     | 0.91235 |            | 12                     | 0.410299 |
|            | 13 | 1.472685              |  |            | 13                     | 0.8966  |            | 13                     | 0.283828 |
|            | 14 | 1.410591              |  |            | 14                     | 1.0568  |            | 14                     | 0.394667 |
|            | 15 | 1.230746              |  |            | 15                     | 0.67273 |            | 15                     | 0.394667 |
|            |    | 1.41059 1.3748 0.043  |  |            | 0.8966 0.853 0.0691    |         |            | 0.39467 0.37314 0.0299 |          |
| <b>1.0</b> | 16 | 1.421346              |  | <b>1.0</b> | 16                     | 0.94383 | <b>1.0</b> | 16                     | 0.520817 |
|            | 17 | 1.604037              |  |            | 17                     | 0.67249 |            | 17                     | 0.377456 |
|            | 18 | 1.403161              |  |            | 18                     | 1.13158 |            | 18                     | 0.581067 |
|            | 19 | 1.609673              |  |            | 19                     | 1.38166 |            | 19                     | 0.710339 |
|            | 20 | 1.407105              |  |            | 20                     | 0.94238 |            | 20                     | 0.358911 |
|            |    | 1.42135 1.4891 0.0482 |  |            | 0.94383 1.01439 0.1174 |         |            | 0.52082 0.50972 0.0655 |          |

Level of global 5mC (%)

Bone marrow

| Radiation dose (Gy) | Animal ID | Levels of global 5mC | Median | Mean   | S.E.  |
|---------------------|-----------|----------------------|--------|--------|-------|
| 0                   | 1         | 0.589                |        |        |       |
|                     | 2         | 0.4095               |        |        |       |
|                     | 3         | 0.43                 |        |        |       |
|                     | 4         | 0.4785               |        |        |       |
|                     | 5         | 0.3145               |        |        |       |
|                     |           |                      | 0.43   | 0.4443 | 0.045 |

Lung

| Radiation dose (Gy) | Animal ID | Levels of global 5mC | Median | Mean   | S.E.   |
|---------------------|-----------|----------------------|--------|--------|--------|
| 0                   | 1         | 1.18515              |        |        |        |
|                     | 2         | 0.85665              |        |        |        |
|                     | 3         | 1.0521               |        |        |        |
|                     | 4         | 1.0653               |        |        |        |
|                     | 5         | 1.2288               |        |        |        |
|                     |           |                      | 1.0653 | 1.0776 | 0.0648 |

Testis

| Radiation dose (Gy) | Animal ID | Levels of global 5mC | Median | Mean  | S.E.  |
|---------------------|-----------|----------------------|--------|-------|-------|
| 0                   | 1         | 0.5535               |        |       |       |
|                     | 2         | 0.703                |        |       |       |
|                     | 3         | 0.794                |        |       |       |
|                     | 4         | 0.417                |        |       |       |
|                     | 5         | 0.3175               |        |       |       |
|                     |           |                      | 0.5535 | 0.557 | 0.038 |

|      |    |        |        |      |
|------|----|--------|--------|------|
| 0.05 | 6  | 0.4615 |        |      |
|      | 7  | 0.419  |        |      |
|      | 8  | 0.488  |        |      |
|      | 9  | 0.324  |        |      |
|      | 10 | 0.564  |        |      |
|      |    | 0.4615 | 0.4513 | 0.04 |

|      |    |         |        |        |
|------|----|---------|--------|--------|
| 0.05 | 6  | 1.06875 |        |        |
|      | 7  | 0.9066  |        |        |
|      | 8  | 1.17525 |        |        |
|      | 9  | 1.1385  |        |        |
|      | 10 | 1.23375 |        |        |
|      |    | 1.1385  | 1.1046 | 0.0563 |

|  |  |        |        |       |        |
|--|--|--------|--------|-------|--------|
|  |  |        | 0.05   | 6     | 0.5515 |
|  |  |        |        | 7     | 0.89   |
|  |  |        |        | 8     | 0.6245 |
|  |  |        |        | 9     | 0.3145 |
|  |  |        |        | 10    | 0.3735 |
|  |  | 0.5515 | 0.5508 | 0.032 |        |

|     |    |        |        |       |  |     |    |         |        |        |  |     |    |        |        |       |  |
|-----|----|--------|--------|-------|--|-----|----|---------|--------|--------|--|-----|----|--------|--------|-------|--|
| 0.1 | 11 | 0.5785 |        |       |  | 0.1 | 11 | 1.24935 |        |        |  | 0.1 | 11 | 0.5395 |        |       |  |
|     | 12 | 0.553  |        |       |  |     | 12 | 1.2474  |        |        |  |     | 12 | 0.377  |        |       |  |
|     | 13 | 0.5255 |        |       |  |     | 13 | 1.21215 |        |        |  |     | 13 | 0.685  |        |       |  |
|     | 14 | 0.464  |        |       |  |     | 14 | 0.99255 |        |        |  |     | 14 | 0.743  |        |       |  |
|     | 15 | 0.4205 |        |       |  |     | 15 | 0.8475  |        |        |  |     | 15 | 0.718  |        |       |  |
|     |    | 0.5255 | 0.5083 | 0.029 |  |     |    | 1.21215 | 1.1098 | 0.0811 |  |     |    | 0.685  | 0.6125 | 0.059 |  |
| 1.0 | 16 | 0.651  |        |       |  | 1.0 | 16 | 1.29485 |        |        |  | 1.0 | 16 | 0.8105 |        |       |  |
|     | 17 | 0.5995 |        |       |  |     | 17 | 1.2011  |        |        |  |     | 17 | 0.781  |        |       |  |
|     | 18 | 0.5945 |        |       |  |     | 18 | 1.31385 |        |        |  |     | 18 | 0.815  |        |       |  |
|     | 19 | 0.4295 |        |       |  |     | 19 | 1.0014  |        |        |  |     | 19 | 0.394  |        |       |  |
|     | 20 | 0.5745 |        |       |  |     | 20 | 1.2654  |        |        |  |     | 20 | 0.416  |        |       |  |
|     |    | 0.5945 | 0.5298 | 0.057 |  |     |    | 1.2654  | 1.2654 | 0.0568 |  |     |    | 0.781  | 0.6433 | 0.06  |  |

Levels of IL-10 (in 100 mg protein)

| <u>Bone marrow</u>  |           |                        | Mean   | S.E.  | <u>Lung</u>         |           |                        | Mean   | S.E. | <u>Testis</u>       |           |                        |        |       |
|---------------------|-----------|------------------------|--------|-------|---------------------|-----------|------------------------|--------|------|---------------------|-----------|------------------------|--------|-------|
| Radiation dose (Gy) | Animal ID | Levels of Median IL-10 |        |       | Radiation dose (Gy) | Animal ID | Levels of Median IL-10 |        |      | Radiation dose (Gy) | Animal ID | Levels of Median IL-10 | Mean   | S.E.  |
| 0                   | 1         | 4.713                  |        |       | 0                   | 1         | 6.57775                |        |      | 0                   | 1         | 8.923536               |        |       |
|                     | 2         | 4.986                  |        |       |                     | 2         | 7.34176                |        |      |                     | 2         | 10.24895               |        |       |
|                     | 3         | 6.091                  |        |       |                     | 3         | 6.81845                |        |      |                     | 3         | 13.47465               |        |       |
|                     | 4         | 4.96                   |        |       |                     | 4         | 6.71338                |        |      |                     | 4         | 10.60873               |        |       |
|                     | 5         | 6.281                  |        |       |                     | 4         | 6.71338                |        |      |                     | 5         | 10.96967               |        |       |
|                     |           | 4.986                  | 5.4059 | 0.323 |                     | 5         | 6.5961                 |        |      |                     |           | 10.609                 | 10.845 | 0.743 |
|                     |           |                        |        |       |                     |           | 6.71338                | 6.8095 | 0.14 |                     |           |                        |        |       |
|                     |           |                        |        |       | 0.05                | 6         | 10.6737                |        |      |                     |           |                        |        |       |

|      |    |       |        |       |  |
|------|----|-------|--------|-------|--|
| 0.05 | 6  | 9.328 |        |       |  |
|      | 7  | 6.138 |        |       |  |
|      | 8  | 6.768 |        |       |  |
|      | 9  | 9.091 |        |       |  |
|      | 10 | 5.998 |        |       |  |
|      |    | 6.768 | 7.4645 | 0.725 |  |

|  |    |           |       |        |  |
|--|----|-----------|-------|--------|--|
|  | 7  | 10.0685   |       |        |  |
|  | 8  | 8.76816 9 |       |        |  |
|  |    | 10.6287   |       |        |  |
|  | 10 | 8.6559    |       |        |  |
|  |    | 10.0685   | 9.759 | 0.4409 |  |

|      |    |            |        |       |  |
|------|----|------------|--------|-------|--|
| 0.05 | 6  | 17.9129    |        |       |  |
|      | 7  | 13.35477 8 |        |       |  |
|      |    | 15.9712    |        |       |  |
|      | 9  | 13.24734   |        |       |  |
|      | 10 | 12.31075   |        |       |  |
|      |    | 13.355     | 14.559 | 1.036 |  |

|     |    |       |     |         |         |          |    |          |    |       |    |         |    |          |
|-----|----|-------|-----|---------|---------|----------|----|----------|----|-------|----|---------|----|----------|
| 0.1 | 11 | 3.538 | 0.1 | 11      | 6.43242 | 0.1      | 11 | 10.73268 | 12 | 4.092 | 12 | 5.88784 | 12 | 12.29926 |
|     | 13 | 4.548 | 13  | 7.60433 | 13      | 13.40989 |    |          |    |       |    |         |    |          |
|     | 14 | 5.989 | 14  | 8.33731 | 14      | 10.62683 |    |          |    |       |    |         |    |          |
|     | 15 | 5.032 | 15  | 6.41224 | 15      | 12.40095 |    |          |    |       |    |         |    |          |

4.548 4.9154 0.406

6.43242 6.9348 0.4493

12.299 11.894 0.533

|     |    |       |        |       |    |  |  |  |
|-----|----|-------|--------|-------|----|--|--|--|
| 1.0 | 16 | 4.453 | 17     | 4.504 | 18 |  |  |  |
|     |    | 5.03  |        |       |    |  |  |  |
|     | 19 |       | 7.421  |       |    |  |  |  |
|     | 20 |       | 5.578  |       |    |  |  |  |
|     |    | 5.03  | 5.3974 | 0.546 |    |  |  |  |

|     |    |         |        |        |  |
|-----|----|---------|--------|--------|--|
| 1.0 | 16 | 6.81875 |        |        |  |
|     | 17 | 6.46066 |        |        |  |
|     | 18 | 6.56455 |        |        |  |
|     | 19 | 5.9834  |        |        |  |
|     | 20 | 7.34    |        |        |  |
|     |    | 6.56455 | 6.6335 | 0.2225 |  |

|     |    |          |    |          |        |       |  |
|-----|----|----------|----|----------|--------|-------|--|
| 1.0 | 16 | 9.517884 | 17 | 9.2756   |        |       |  |
|     |    |          | 18 | 11.8389  |        |       |  |
|     |    |          | 19 | 9.842398 |        |       |  |
|     |    |          | 20 | 10.70568 |        |       |  |
|     |    |          |    | 9.8424   |        |       |  |
|     |    |          |    |          | 10.236 | 0.468 |  |

Levels of global 5hmC (%)

Bone marrow

| Radiation dose (Gy) | Animal ID | Levels of global 5hmC | Median | Mean   | S.E.  |
|---------------------|-----------|-----------------------|--------|--------|-------|
| 0                   | 1         | 0.075                 |        |        |       |
|                     | 2         | 0.0925                |        |        |       |
|                     | 3         | 0.0675                |        |        |       |
|                     | 4         | 0.0825                |        |        |       |
|                     | 5         | 0.0565                |        |        |       |
|                     |           |                       | 0.075  | 0.0748 | 0.002 |
| 0.05                | 6         | 0.0735                |        |        |       |
|                     | 7         | 0.0695                |        |        |       |
|                     | 8         | 0.0745                |        |        |       |
|                     | 9         | 0.0785                |        |        |       |
|                     | 10        | 0.044                 |        |        |       |
|                     |           |                       | 0.0735 | 0.068  | 0.003 |
| 0.1                 | 11        | 0.059                 |        |        |       |
|                     | 12        | 0.0805                |        |        |       |
|                     | 13        | 0.0645                |        |        |       |
|                     | 14        | 0.046                 |        |        |       |

Lung

| Radiation dose (Gy) | Animal ID | Levels of global 5hmC | Median | Mean   | S.E.   |
|---------------------|-----------|-----------------------|--------|--------|--------|
| 0                   | 1         | 0.419                 |        |        |        |
|                     | 2         | 0.413                 |        |        |        |
|                     | 3         | 0.3645                |        |        |        |
|                     | 4         | 0.3845                |        |        |        |
|                     | 5         | 0.511                 |        |        |        |
|                     |           |                       | 0.413  | 0.4184 | 0.0252 |
| 0.05                | 6         | 0.409                 |        |        |        |
|                     | 7         | 0.3875                |        |        |        |
|                     | 8         | 0.401                 |        |        |        |
|                     | 9         | 0.39                  |        |        |        |
|                     | 10        | 0.4295                |        |        |        |
|                     |           |                       | 0.401  | 0.4034 | 0.0276 |
| 0.1                 | 11        | 0.3505                |        |        |        |
|                     | 12        | 0.3475                |        |        |        |
|                     | 13        | 0.308                 |        |        |        |

Testis

| Radiation dose (Gy) | Animal ID | Levels of global 5hmC | Median | Mean   | S.E.  |
|---------------------|-----------|-----------------------|--------|--------|-------|
| 0                   | 1         | 0.1555                |        |        |       |
|                     | 2         | 0.1465                |        |        |       |
|                     | 3         | 0.1255                |        |        |       |
|                     | 4         | 0.133                 |        |        |       |
|                     | 5         | 0.0795                |        |        |       |
|                     |           |                       | 0.133  | 0.128  | 0.003 |
| 0.05                | 6         | 0.0955                |        |        |       |
|                     | 7         | 0.157                 |        |        |       |
|                     | 8         | 0.092                 |        |        |       |
|                     | 9         | 0.1555                |        |        |       |
|                     | 10        | 0.092                 |        |        |       |
|                     |           |                       | 0.0955 | 0.1184 | 0.004 |
| 0.1                 | 11        | 0.09                  |        |        |       |
|                     | 12        | 0.0965                |        |        |       |
|                     | 13        | 0.0865                |        |        |       |
|                     | 14        | 0.067                 |        |        |       |

15 0.0435  
0.059 0.0587 0.005

---

14 0.249  
15 0.274  
0.308 0.3058 0.02

---

15 0.0595  
0.0865 0.0799 0.004

---

1.0 16 0.063  
17 0.054

1.0 16 0.3295  
17 0.3055

1.0 16 0.068  
17 0.096

18 0.0405  
19 0.0395  
20 0.027  
0.0405 0.0448 0.005

18 0.334  
19 0.194  
20 0.213  
0.3055 0.2752 0.0298

18 0.081  
19 0.0545  
20 0.065  
0.068 0.0729 0.005

---
